# Supplementary material
Source: publisher figshare collection journal article supplement (https://acs.figshare.com/ndownloader/files/5692803)

**Table S1.** Control Reactions of the Epoxidations of *cis*-Stilbene and *trans*-Stilbene by Fe(TPP)(CF<sub>3</sub>SO<sub>3</sub>) and PhIO<sup>a,b</sup>

| substrate              | products                     | product yields (%) <sup>c</sup> |
|------------------------|------------------------------|---------------------------------|
| <i>cis</i> -stilbene   | <i>cis</i> -stilbene oxide   | 39 ± 4                          |
|                        | <i>trans</i> -stilbene oxide | 4 ± 2                           |
|                        | benzaldehyde                 | 3 ± 1                           |
| <i>trans</i> -stilbene | <i>cis</i> -stilbene oxide   | 0                               |
|                        | <i>trans</i> -stilbene oxide | 53 ± 4                          |
|                        | benzaldehyde                 | 3 ± 1                           |

<sup>a</sup> Reaction conditions were the same as described in the part of Catalytic Competitive Epoxidations in Experimental Section except that *cis*-stilbene and *trans*-stilbene were used individually. All reactions were run at least in triplicate, and the data reported represent the average of these reactions.

<sup>b</sup> In the absence of the iron porphyrin catalyst, only trace amounts of oxide products were yielded.

<sup>c</sup> Based on the amounts of PhIO added.

**Figure S1.** UV-vis spectra of the reaction solutions of Fe(TPFPP)Cl and Fe(TPFPP)(CF<sub>3</sub>SO<sub>3</sub>) taken before and after the addition of *m*-CPBA: (A) Fe(TPFPP)Cl, (B) Fe(TPFPP)Cl + *m*-CPBA, (C) Fe(TPFPP)(CF<sub>3</sub>SO<sub>3</sub>), (D) Fe(TPFPP)(CF<sub>3</sub>SO<sub>3</sub>) + *m*-CPBA. Reaction conditions: *m*-CPBA ( $7.5 \times 10^{-3}$  mmol, diluted in 20  $\mu$ L of CH<sub>3</sub>CN) was added to a stirred solution containing an iron porphyrin complex ( $1.5 \times 10^{-3}$  mmol) and equal amounts of *cis*- and *trans*-stilbenes (0.2 mmol each) in a solvent mixture (0.5 mL) of CH<sub>3</sub>CN and CH<sub>2</sub>Cl<sub>2</sub> (1:1) at room temperature. UV-vis spectra of the reaction solutions (1.5 mM) were taken in 0.1-mm UV cell.

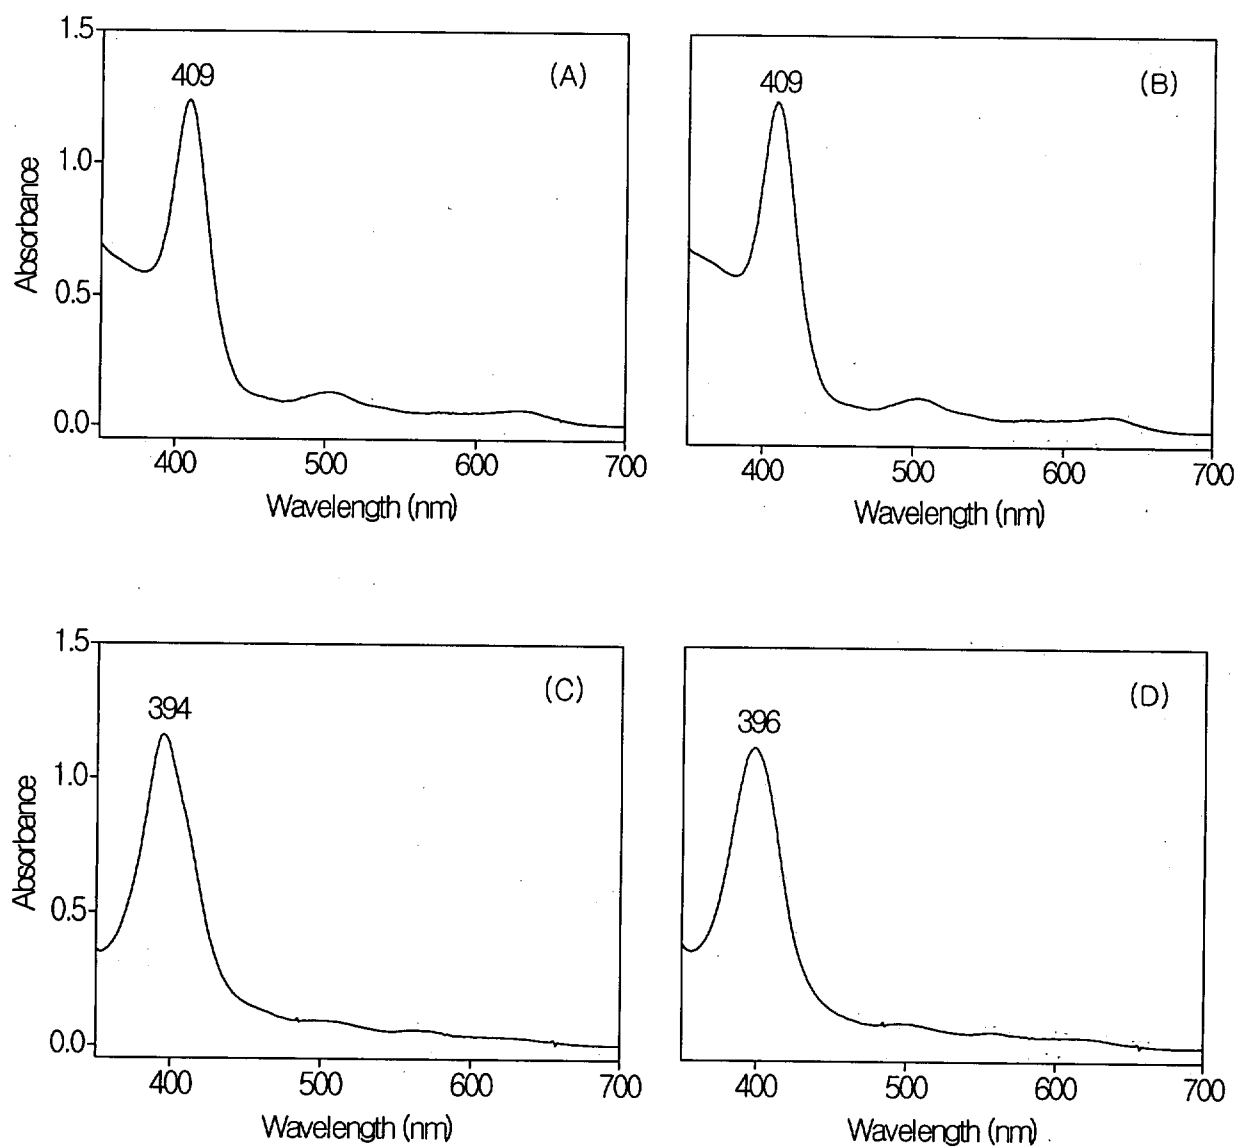

Supplement: Supplementary file 1 [file 5692803]
